# Supplementary material for: EBF2 transcriptionally regulates brown adipogenesis via the histone reader DPF3 and the BAF chromatin remodeling complex
Source: PubMed Central journal article supplement — Genes Dev. 2017 Apr 1;31(7):660–73. doi: 10.1101/gad.294405.116 (PMC5411707; doi:10.1101/gad.294405.116), 2017-04-01
Supplement: supp_gad.294405.116_SuppFigures_and_Tables.pdf [file supp_gad.294405.116_SuppFigures_and_Tables.pdf]

**A.**

| De Novo Motif | TF Match | P-Value              |
|---------------|----------|----------------------|
|               | EBF      | 10 <sup>-11579</sup> |
|               | C/EBPα   | 10 <sup>-1395</sup>  |
|               | TEAD     | 10 <sup>-642</sup>   |

**B.**

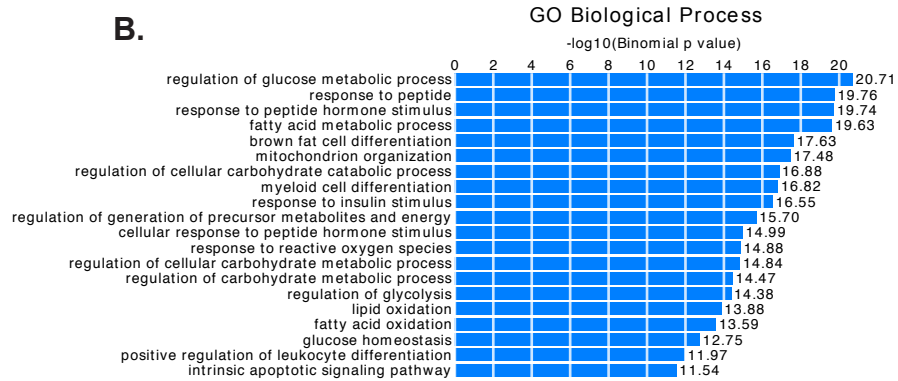

**C.**

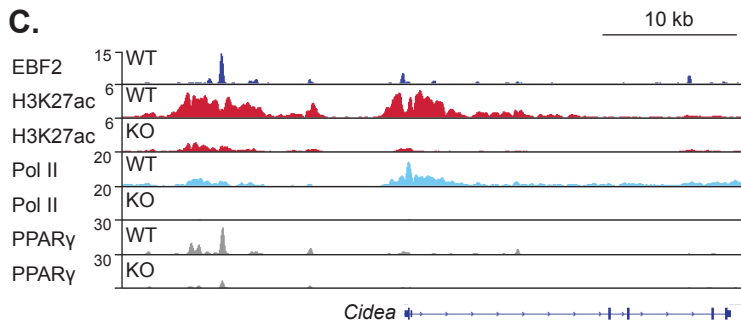

**D.**

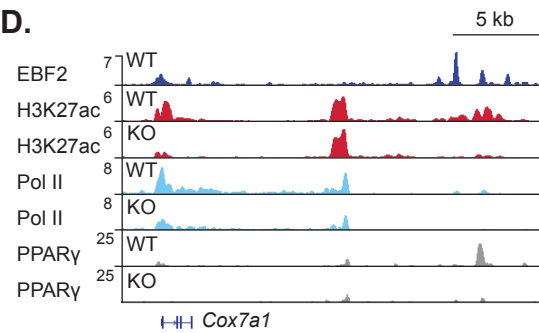

**E.**

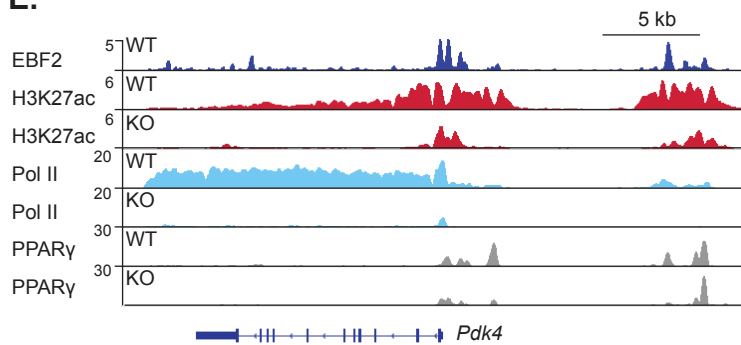

**F.**

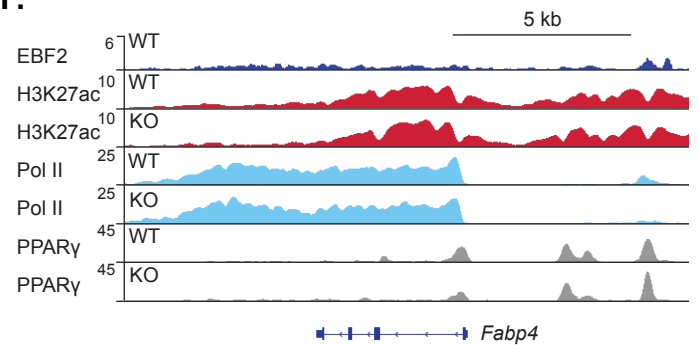

**G.**

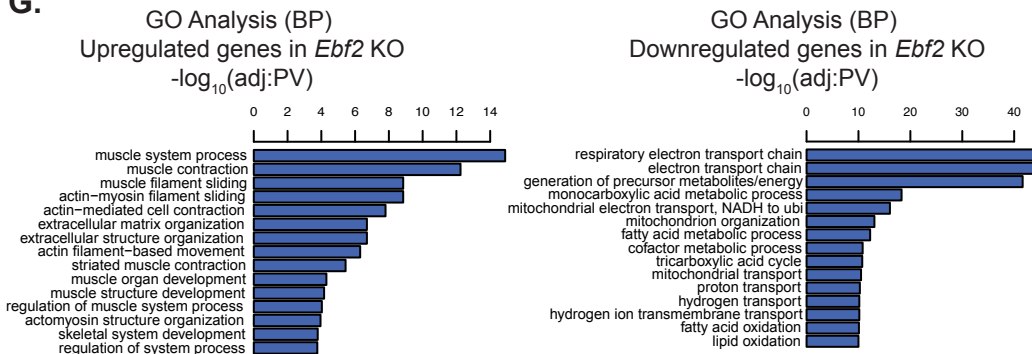

**H.**

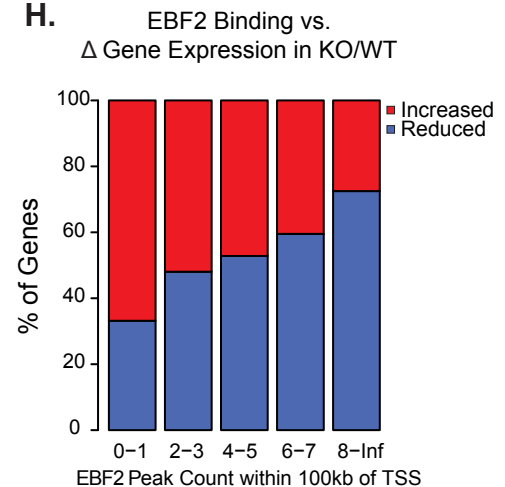

**Supplemental Figure 1.** EBF2 binds and regulates the chromatin state at brown fat-specific genes. (A) *De novo* motif analysis of EBF2 binding sites. (B) GREAT analysis of the top 5000 genes with nearby EBF2 binding sites in brown adipose tissue. (C) ChIP-seq profiles in reads per million total reads (RPM) for EBF2 (dark blue), H3K27ac (red), RNA Pol II (light blue), and PPAR $\gamma$  (grey) in *Ebf2* wildtype and knockout BAT at *Cidea*, (D) *Cox7a1*, (E) *Pdk4*, and (F) *Fabp4*. (G) Gene ontology analysis of differentially expressed genes in *Ebf2* KO relative to WT brown adipose tissue. (H) Barplot of differentially regulated genes with proximal EBF2 binding sites within a 100kb window around the TSS.

**A. Brown Adipocytes**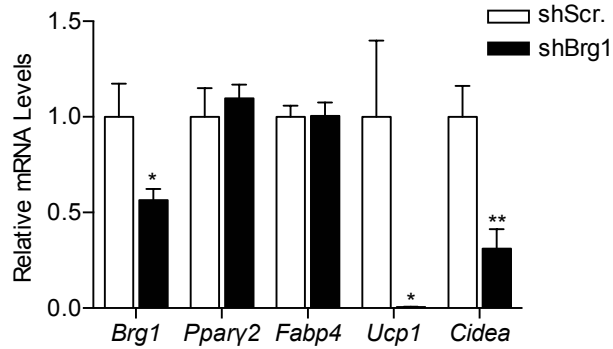**B. Inguinal White Adipose Tissue**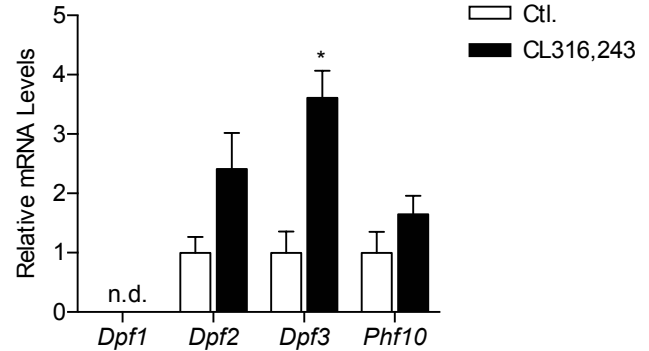

**Supplemental Figure 2.** EBF2 interacts with the BAF complex, which incorporates the subunit DPF3 in brown adipocytes. (A) RT-qPCR analysis of day 7 mature brown adipocytes following shRNA-mediated BRG1 depletion (mean  $\pm$  SD; n=3, two-sample Student's t-test, \* p < 0.05, \*\* p < 0.01). (B) RT-qPCR analysis of DPF family member expression in inguinal white adipose following injection with the  $\beta$ 3-agonist CL316,243 (mean  $\pm$  SE; n=3, two-sample Student's t-test, \* p < 0.05, \*\* p < 0.01).

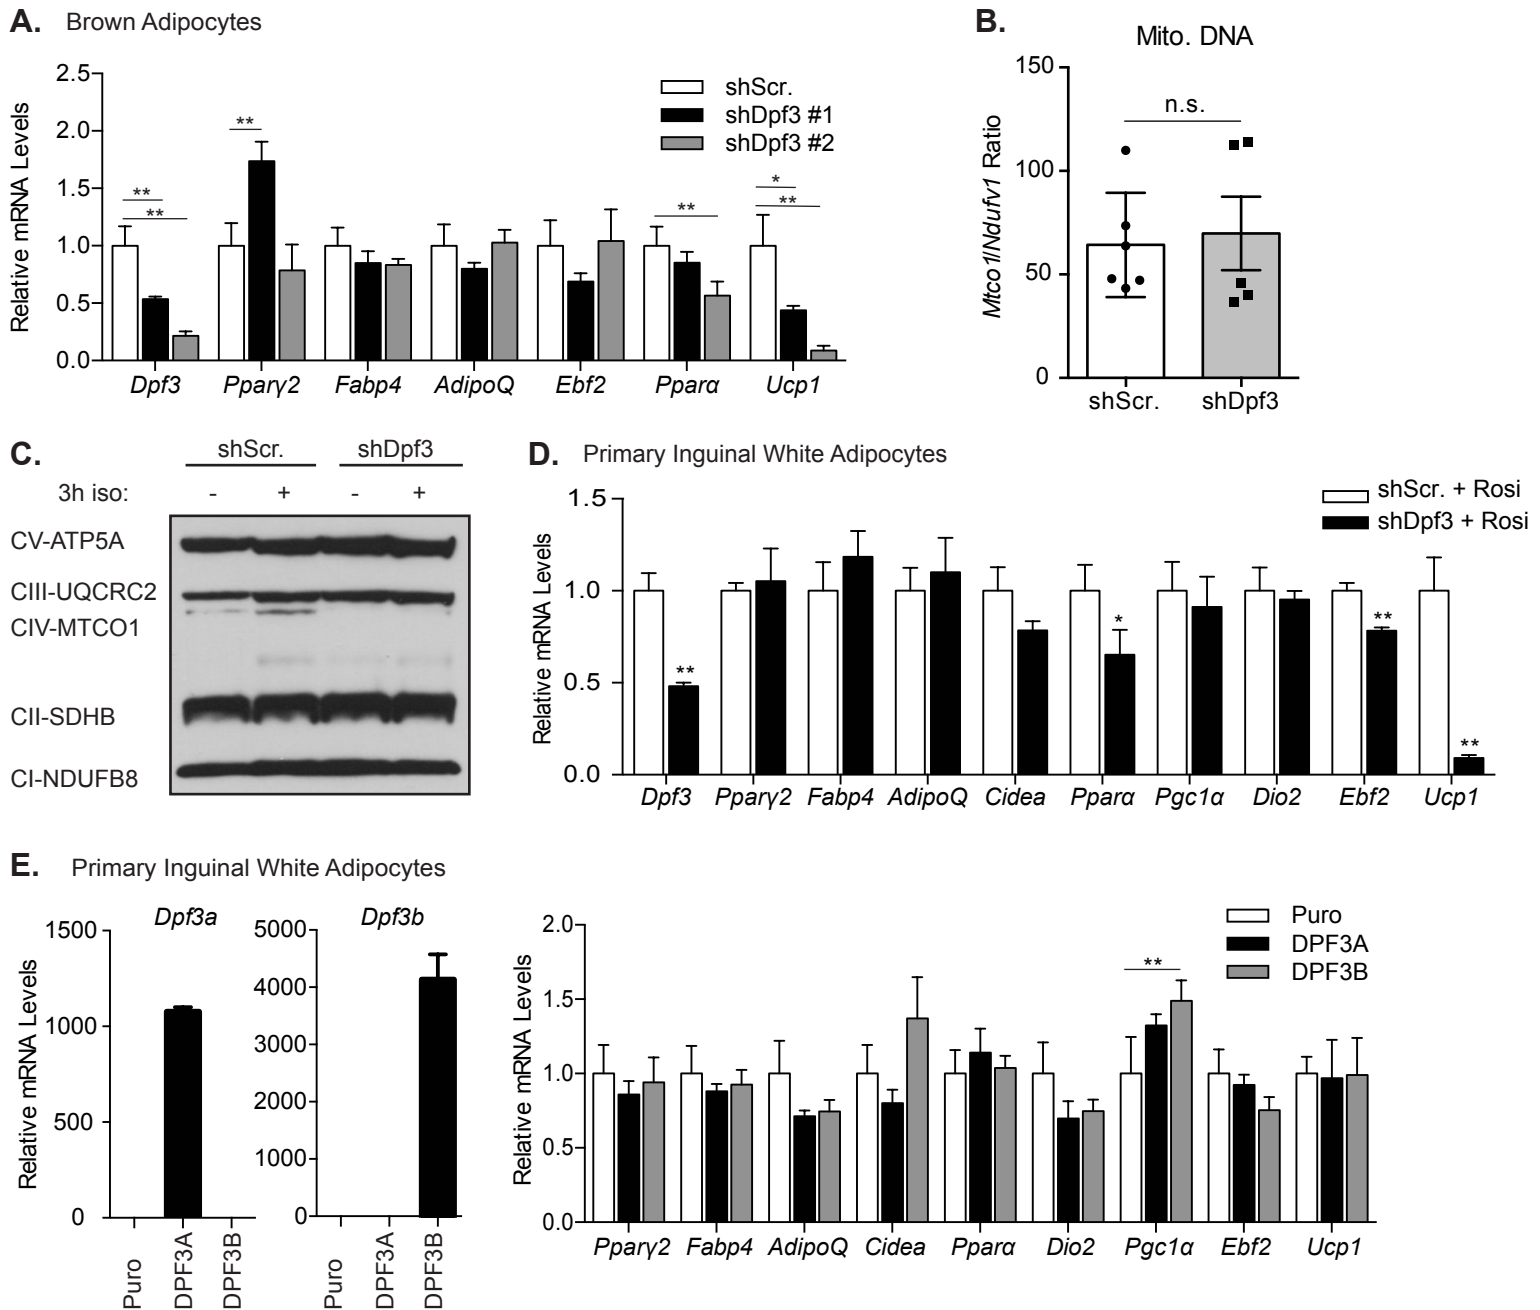

**Supplemental Figure 3.** DPF3 is required for activation of the brown fat program and mitochondrial function. (A) RT-qPCR analysis of mature brown adipocytes following shRNA-mediated *Dpf3* depletion using two independent shRNAs (n=3). (B) Quantification of mitochondrial DNA content in control and *Dpf3*-depleted cells (n=5-6). (C) Western blot analysis of OXPHOS components in brown adipocytes. (D) RT-qPCR analysis of of day 7 primary inguinal adipocytes differentiated with rosiglitazone following shRNA-mediated *Dpf3* depletion (n=3). (E) RT-qPCR analysis of day 7 primary inguinal adipocytes following retroviral-mediated overexpression of DPF3A or DPF3B (n=3) (all gene expression data show mean  $\pm$  SD; two-sample Student's t-test, \*  $p < 0.05$ , \*\*  $p < 0.01$ ).

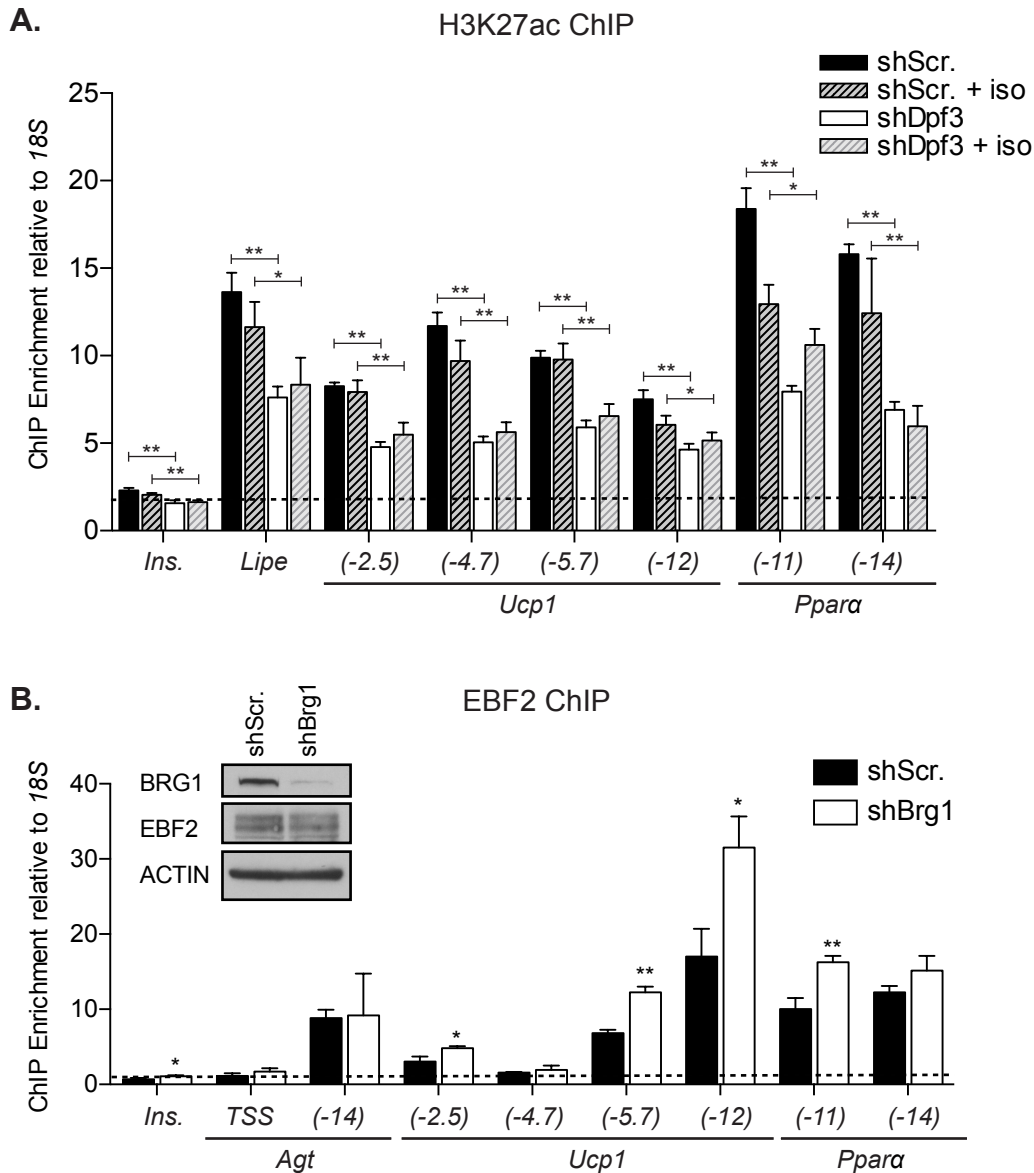

**Supplemental Figure 4.** DPF3 regulates the chromatin state at brown fat-specific genes. (A) ChIP-qPCR analysis of the H3K27ac profile in brown adipocytes  $\pm$  isoproterenol (mean  $\pm$  SD;  $n=3$ , two-way ANOVA with Holm-Šidák multiple tests correction comparing shScr. vs. shDpf3 in the basal or stimulated state, \*  $p < 0.05$ , \*\*  $p < 0.01$ ). (B) EBF2 ChIP-qPCR in BRG1-depleted brown adipocytes (mean  $\pm$  SD;  $n=3$ , two-sample Student's t-test, \*  $p < 0.05$ , \*\*  $p < 0.01$ ). Chromatin enrichment is analyzed as percent input recovery and normalized to 18S percent input to produce a fold enrichment. The insulin promoter serves as a negative control.

A.

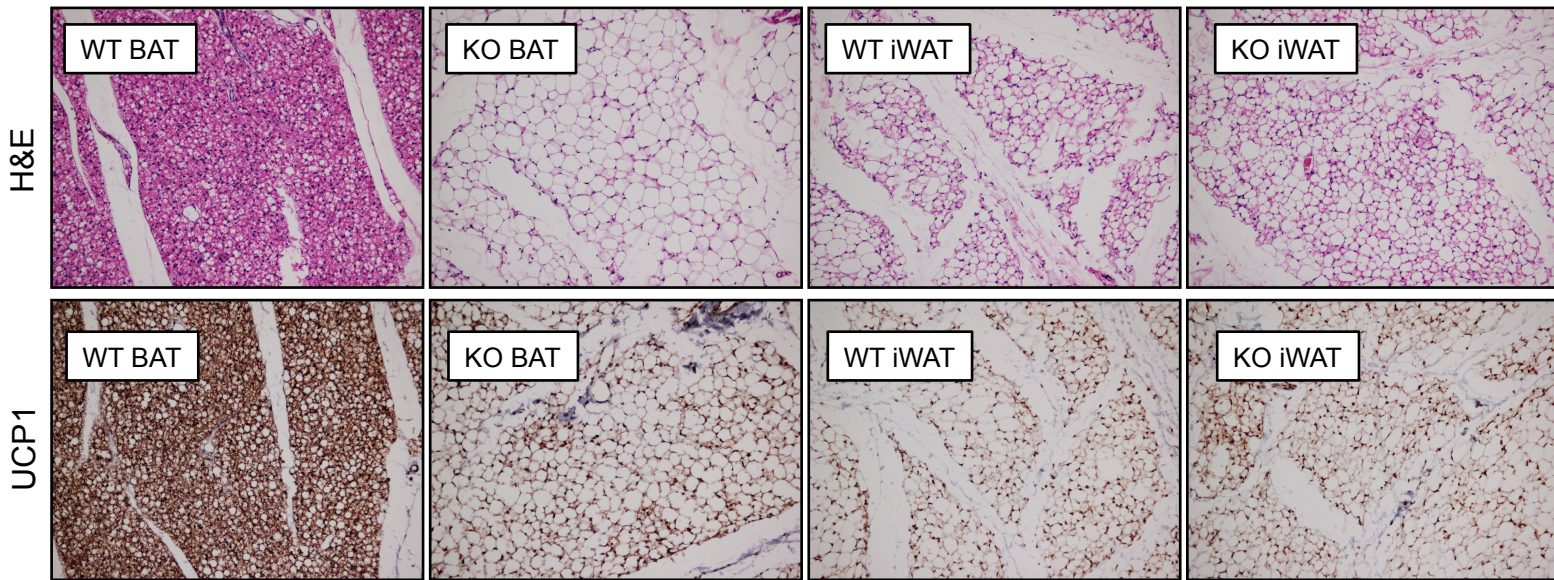

B.

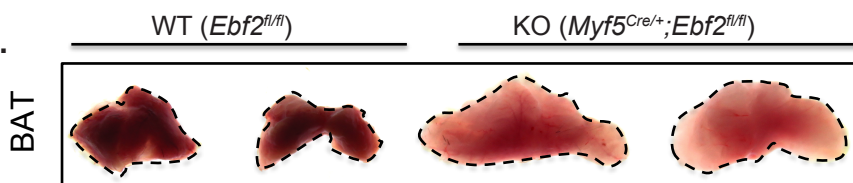

C. Brown Adipose Tissue

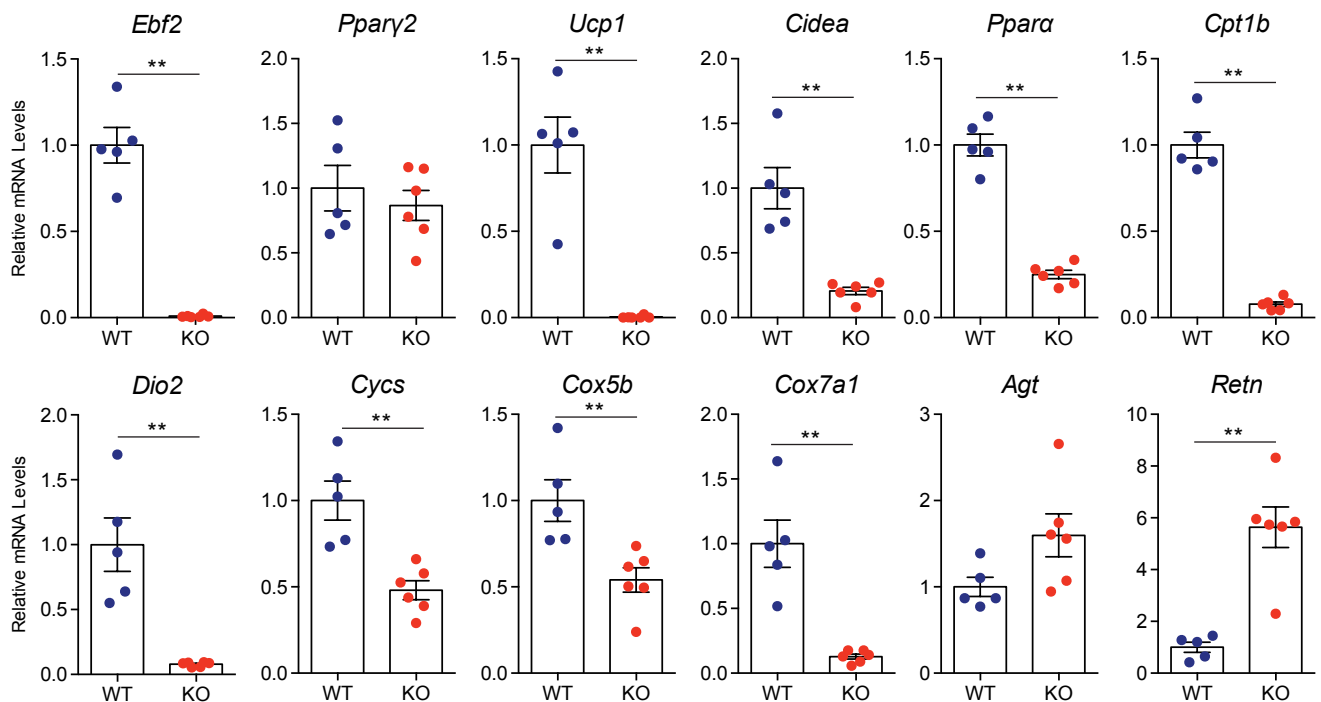

**Supplemental Figure 5.** EBF2 transcriptionally regulates *Dpf3* expression (A) H&E staining and UCP1 immunohistochemical staining of representative sections from the BAT and iWAT of 12-week-old WT (*Ebf2<sup>fl/fl</sup>*) and KO (*Myf5<sup>Cre/+</sup>;Ebf2<sup>fl/fl</sup>*) mice. (B) Gross morphology of brown adipose tissue from WT and KO mice. (C) Gene expression analysis of common, brown fat-specific, mitochondrial, and white fat-specific genes in WT and KO BAT (mean  $\pm$  SEM; n=5-6, two-sample Student's t-test, \*\* p < 0.01)

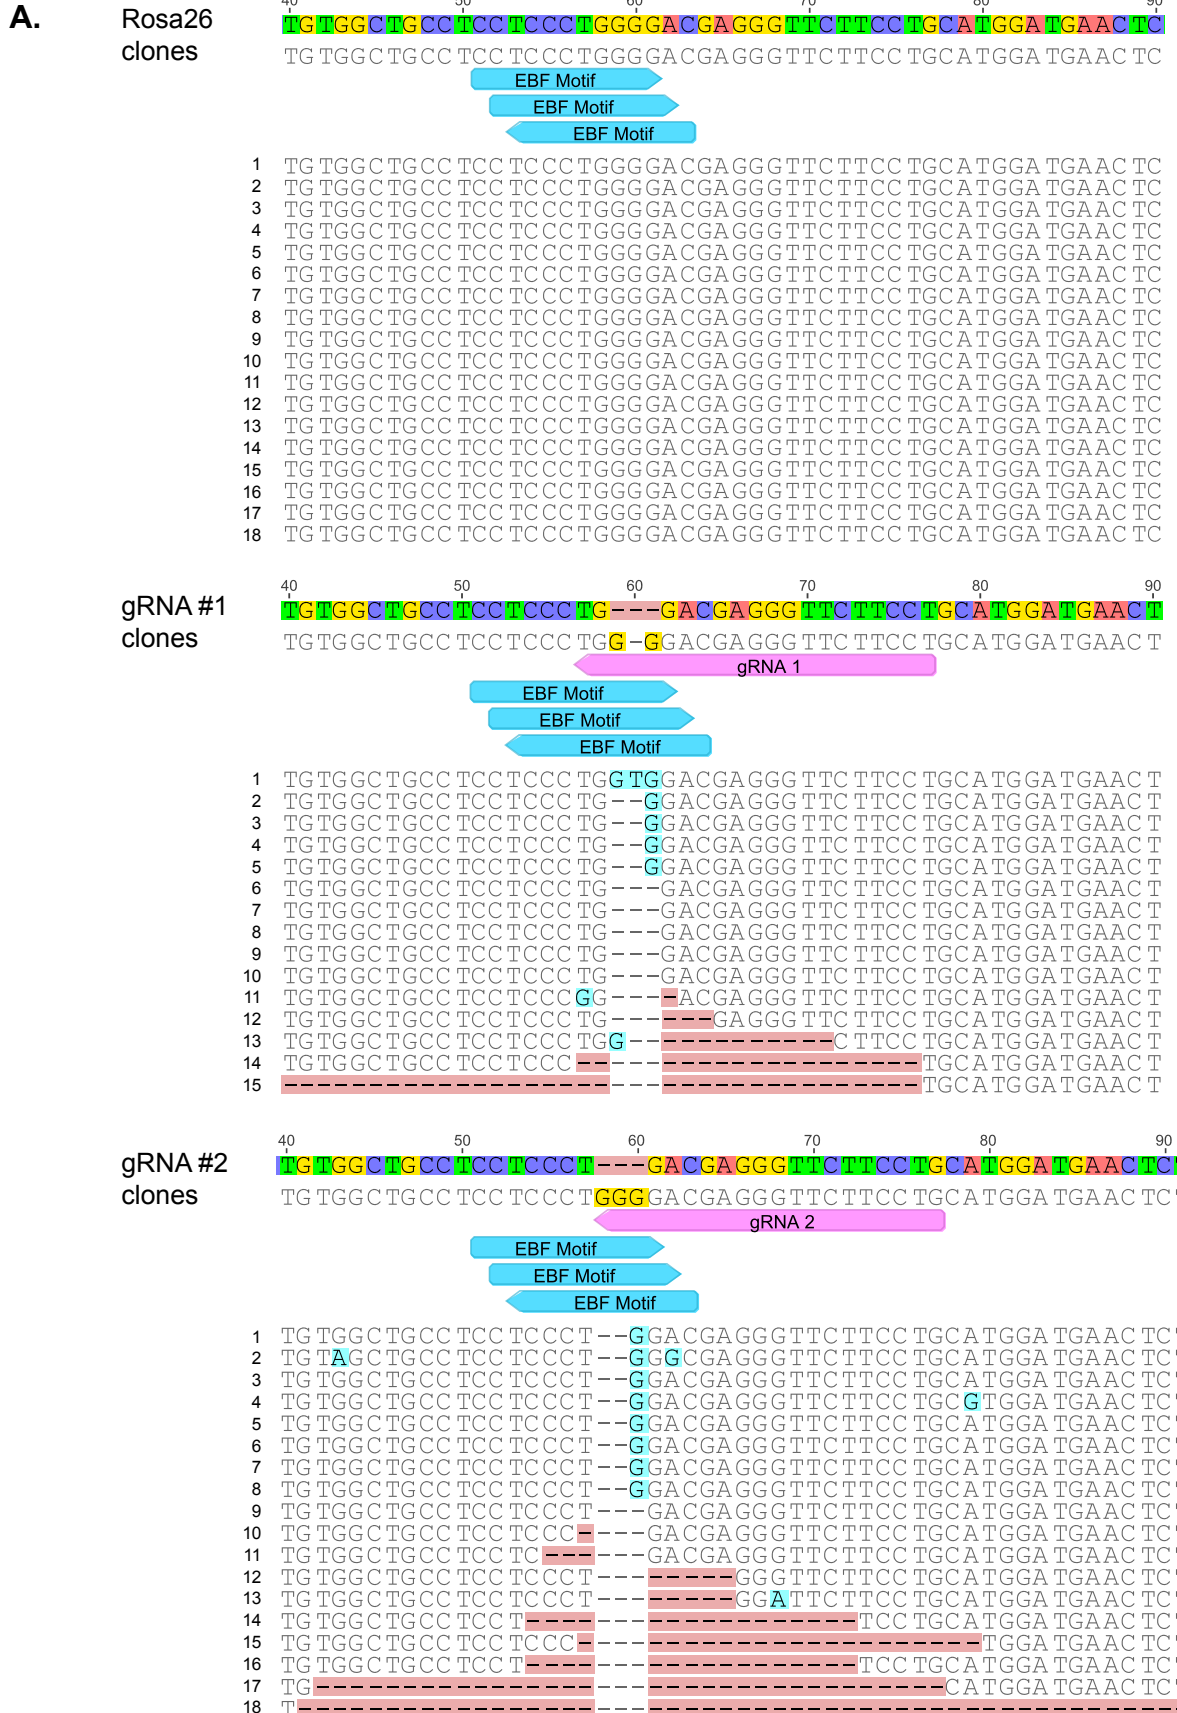

**Supplemental Figure 6.** EBF2 directly regulates *Dpf3* expression via an intronic enhancer. (A) TA cloning and sequencing showing mutations induced following CRISPR-Cas9 editing of the EBF motif in the *Dpf3* +20k enhancer.

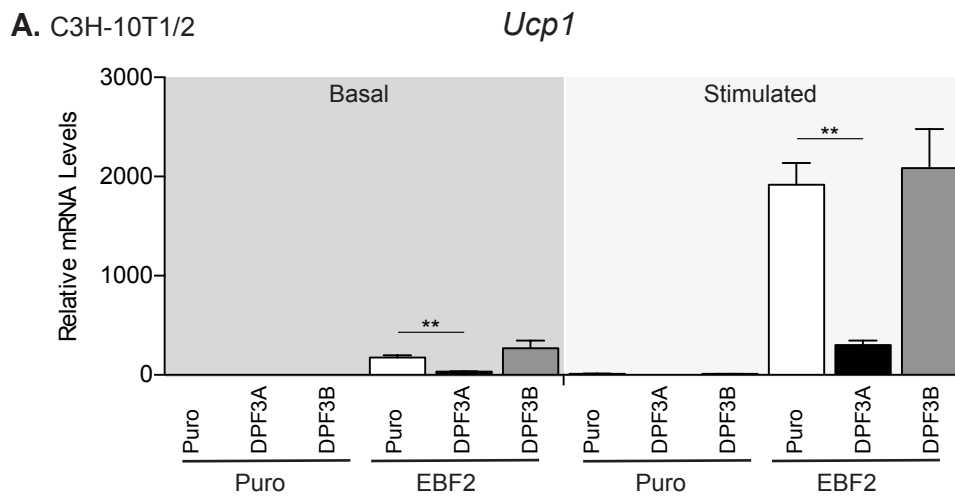

**Supplemental Figure 7.** Critical role for histone binding activity of DPF3 in brown adipocytes. (A) RT-qPCR analysis of differentiated C3H-10T1/2 cells under basal or isoproterenol-stimulated conditions. (mean  $\pm$  SD; n=3, two-sample Student's t-test, \*\* p < 0.01).

**Table S1.** Primers used for RT-qPCR, ChIP-qPCR, and FAIRE-qPCR analysis

| Gene                | Forward                   | Reverse                   |
|---------------------|---------------------------|---------------------------|
| <i>Actl6a</i>       | CGTTCTCAGGGAGAGGAGTC      | CAACTTCATCTCCGCCGTACA     |
| <i>Actl6b</i>       | TACAGCAAGGCATCGTCAAG      | CTTGGCTGCAATCATGTAAGGA    |
| <i>Adiponectin</i>  | GCACTGGCAAGTTCTACTGCAA    | GTAGGTGAAGAGAACGGCCTTGT   |
| <i>Agt</i>          | AAGACCCTGCATGATCAGCTC     | CTTCCTGCCTCATTGAGCATC     |
| <i>Arid1a</i>       | TCCTCAGTCAACCAGCAGTT      | ACTGAGTTGCTCCTGCTCAT      |
| <i>Arid1b</i>       | GGCAGATCCCAGGGCAG         | CCTCCTGGGTATGGGCTG        |
| <i>Arid2</i>        | TCCGGGACTTCACAGATGAAA     | TCTTTAACAATCTGCGCCAC      |
| <i>Brg1</i>         | AAGAAGCAGAAGAAACGTGGG     | CACTGCTGCTGTCTTTGTACT     |
| <i>Brm</i>          | CTCGCGAGCAAGTGTC          | ACTAGGCCCCAGAATTGGTC      |
| <i>Cidea</i>        | TGCTCTTCTGTATCGCCCAGT     | GCCGTGTTAAGGAATCTGCTG     |
| <i>Cox5b</i>        | GCTGCATCTGTGAAGAGGACAAC   | CAGCTTGTAATGGGTTCCACAGT   |
| <i>Cox7a1</i>       | CAGCGTCATGGTCAGTCTGT      | AGAAAACCGTGTGGCAGAGA      |
| <i>Cpt1b</i>        | GCTCATTTCGGGACAAAGG       | TTGGTACAGGAACGCACAGT      |
| <i>Cycs</i>         | GCAAGCATAAGACTGGACAAA     | TTGTTGGCATCTGTGTAAGAGAATC |
| <i>Dio2</i>         | CAGTGTGGTGCACGTCTCCAATC   | TGAACCAAAGTTGACCACCAG     |
| <i>Dpfl</i>         | AGAACCCTCAAGTCCCTT        | GGTCTGCGAGTCGAGGAAAG      |
| <i>Dpf2</i>         | GGGAAGTCCAAGAGTAAGGGT     | CGCTTTCGAGGTATGCTTTTG     |
| <i>Dpf3</i>         | GAGTACCACACTGGAAGCCT      | TCCCTTCTTCTACGTTTTCATCA   |
| <i>Ebf2</i>         | GCTGCGGAACCGGAACGAGA      | ACACGACCTGGAACCGCCTCA     |
| <i>Fabp4</i>        | ACACCGAGATTTCTTCAAACCTG   | CCATCTAGGGTTATGATGCTCTTCA |
| <i>Pbrm</i>         | CCTATACACCCACAGTCTAC      | CAGCTCTCATTCACTGCTGA      |
| <i>Phf10</i>        | TGACCTCCTTCAAGCGGAAA      | CGCAATGCTGTTAAACCCAGT     |
| <i>Pgc1a</i>        | CCCTGCCATTGTTAAGACC       | TGCTGCTGTTCTGTTTTTTC      |
| <i>Ppara</i>        | GCGTACGGCAATGGCTTTAT      | GAACGGCTTCCTCAGGTTCTT     |
| <i>Pparγ2</i>       | GCATGGTGCCTTCGCTGA        | TGGCATCTCTGTGTCAACCATG    |
| <i>Retn</i>         | CTGTCCAGTCTATCCTTGCACAC   | CAAAGGCACAGCAGTCTTGA      |
| <i>Smarcb1</i>      | AAACCTAACACTAAGGATCATGGA  | TGATGGACACAGCCTTGTACT     |
| <i>Smarcc1</i>      | CAACCAGGTCAAATACCAGGC     | CACTCCAGTAGGGTGAATGT      |
| <i>Smarcc2</i>      | AACAGCCCAGATTCAGACAGA     | TGAGGGTCCTTTCTTAGCGTT     |
| <i>Smarcd1</i>      | CAAAATCGAAATCACAATGCAAAGA | GAGATCCATGTAGGCCTGTGA     |
| <i>Smarcd2</i>      | CCCAGAGTCTCAGGCATACAT     | GTTTTGCTTTTTCGCTCAGAG     |
| <i>Smarcd3</i>      | GAGCCGTGATCTCAAGGTGAT     | GCTGCTGGATCTTACAGTAGAA    |
| <i>Smarce1</i>      | CGGGACAAAGGGAAGCGAAG      | GGGGCATAAGATGGTCTTTTTGA   |
| <i>Tbp</i>          | GAAGCTGCGGTACAATTCCAG     | CCCCTTGTACCCTTACCAAT      |
| <i>Ucp1</i>         | ACTGCCACACCTCCAGTCATT     | CTTTGCCTCACTCAGGATTGG     |
| <i>Mtcol (Mt.)</i>  | TGCTAGCCGCAGGCATTAC       | GGGTGCCCAAAGAATCAGAAC     |
| <i>Ndufv1 (Mt.)</i> | CTTCCCCACTGGCCTCAAG       | CCAAAACCCAGTGATCCAGC      |

| ChIP/FAIRE         | Forward               | Reverse                  |
|--------------------|-----------------------|--------------------------|
| <i>I8S</i>         | AGTCCCTGCCCTTTGTACACA | CGATCCGAGGGCCTCACT       |
| <i>Ins1</i>        | GGACCCACAAGTGGAAACAAC | GTGCAGCACTGATCCACAAT     |
| <i>Agt (TSS)</i>   | CTTGGTCAAGCCTGGATTCTC | CCAACCTAGACAAGCACAGCTATC |
| <i>Agt (-14kb)</i> | GCAGGCAGGCATCCACGTCTT | CAGTGAGGAGCACCGGTCTGG    |



|                      |                          |                        |
|----------------------|--------------------------|------------------------|
| <i>Hbb</i>           | CAGGGAGAAATATGCTTGTCATCA | GTGAGCAGATTGGCCCTTACC  |
| <i>Lipe</i>          | TGGGTCATAGTTGGCTAGGG     | CAGTGGGGACATGGGTAAGT   |
| <i>Ucp1 (-2.5kb)</i> | CAAATGGTGACCGGGTGCCCT    | GGGTGACTGACCCTCTGTGACG |
| <i>Ucp1 (-4.7kb)</i> | CCCCACTGCCTGTCACGTTCA    | GAAGCTGCCGAATGGTGCGTC  |
| <i>Ucp1 (-5.7kb)</i> | ACCACACCATTGGAGCCTGAC    | TGAGTTTGCAGGGAGGATGGGC |
| <i>Ucp1 (-12kb)</i>  | GTCACCAAGCCTTCCTCCGCA    | GTGAGCTGGTGGTGGTCAGGG  |
| <i>Ppara (-11kb)</i> | AAGAGCATGGGACAGTGGCCG    | TGGCCAGCTGAAGGTCACCAC  |
| <i>Ppara (-14kb)</i> | CCTGCCCCATAGGCAGTATGGTC  | ACAGGGGCAGAAGCCAAGCTG  |
